# Supplementary material
Source: Springer Nature journal article supplement (https://www.springermedizin.de/resource/supplementary/12874_2012_893_MOESM6_ESM.pdf/9433024)

Figure 3A: Cost-effectiveness acceptability curve for 55-year-old patients

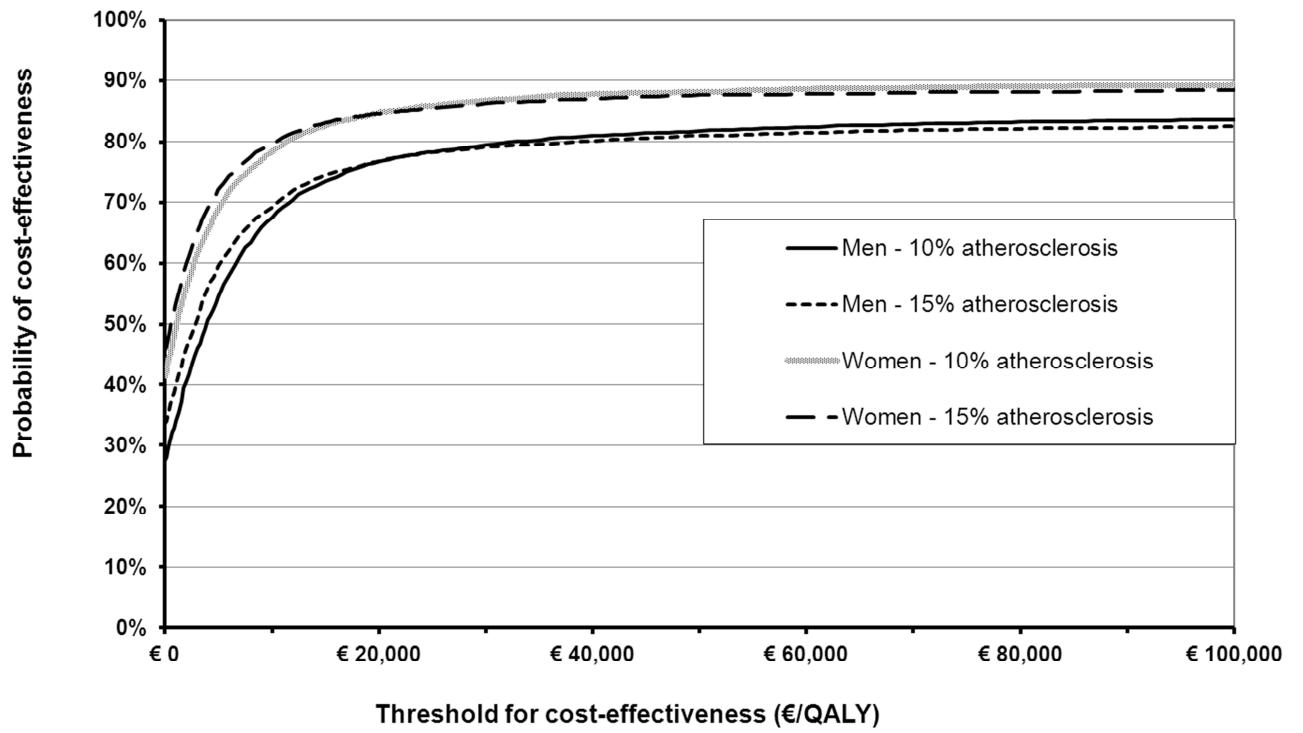

Supplement: MOESM6 [file 9433024]
